# Supplementary material
Source: PubMed Central journal article supplement (PMC4154696)
Supplement: NIHMS329829-supplement-Supplementary_Data.pdf [file NIHMS329829-supplement-Supplementary_Data.pdf]

**AJAE appendix for “How Much Does the Supplemental Nutrition Assistance Program Reduce Food Insecurity?”**

Caroline Ratcliffe  
Signe-Mary McKernan  
Sisi Zhang

March 2011

Note: The material contained herein is supplementary to the article named in the title and published in the American Journal of Agricultural Economics (AJAE).

**Appendix Table A-1: Descriptive Statistics,  
Households with Income below 150% of Poverty Threshold<sup>a</sup>**

| <b>Variable</b>                                               | <b>Mean</b> | <b>Standard<br/>Deviation</b> |
|---------------------------------------------------------------|-------------|-------------------------------|
| <b><u>Program Participation and Food-Related Hardship</u></b> |             |                               |
| <i>SNAP Receipt</i>                                           | 0.286       |                               |
| <i>Food Insecure</i>                                          | 0.244       |                               |
| <i>Very Food Insecure</i>                                     | 0.103       |                               |
| <b><u>Demographic Characteristics</u></b>                     |             |                               |
| <i>Age</i>                                                    | 47.982      | 18.547                        |
| <i>Noncitizen immigrant</i>                                   | 0.112       |                               |
| <i>White, non-Hispanic (omitted)</i>                          | 0.537       |                               |
| <i>Black, non-Hispanic</i>                                    | 0.231       |                               |
| <i>Hispanic</i>                                               | 0.189       |                               |
| <i>Other, non-Hispanic</i>                                    | 0.043       |                               |
| <i>Education less than high school</i>                        | 0.271       |                               |
| <i>Education high school only</i>                             | 0.354       |                               |
| <i>Education more than high school (omitted)</i>              | 0.375       |                               |
| <i>Number of children in household</i>                        | 1.010       | 1.385                         |
| <i>Number of adults in household</i>                          | 1.544       | 0.747                         |
| <i>Female-headed household</i>                                | 0.518       |                               |
| <i>Male-headed household</i>                                  | 0.198       |                               |
| <i>Two adult-headed household (omitted)</i>                   | 0.284       |                               |
| <i>Disabled person in household</i>                           | 0.294       |                               |
| <i>Metropolitan area</i>                                      | 0.747       |                               |
| <b><u>Economic Variables</u></b>                              |             |                               |

|                                                  |        |       |
|--------------------------------------------------|--------|-------|
| <i>State monthly unemployment</i>                | 5.290  | 1.040 |
| <i>State monthly employment-population ratio</i> | 0.947  | 0.010 |
| <i>State annual per capita income</i>            | 29,361 | 4,058 |
| <i>Quarterly GDP (in billions)</i>               | 10,275 | 730   |

**Instruments**

|                                                             |       |       |
|-------------------------------------------------------------|-------|-------|
| <i>Biometric technology</i>                                 | 0.257 |       |
| <i>Outreach spending per capita</i>                         | 0.024 | 0.083 |
| <i>All legal immigrants eligible X noncitizen immigrant</i> | 0.026 |       |
| <i>Some legal immigrants eligible X noncitizen immigr</i>   | 0.078 |       |

|                        |        |
|------------------------|--------|
| Number of Observations | 65,269 |
|------------------------|--------|

---

<sup>a</sup> Sample includes householdes with income below 150% of the poverty threshold who have liquid assets below \$4,000, or below \$5,000 if one member of the household is age 60 or older.

**Appendix Table A-2: Bivariate Probit (IV) Estimates of the Effects of SNAP Participation on the Likelihood of Being Very Food Insecure, Households with Income below 150% of Poverty Threshold<sup>a</sup>**

| Explanatory Variable                                         | SNAP Participation   | Very Food Insecure   |
|--------------------------------------------------------------|----------------------|----------------------|
| <i>SNAP participation</i>                                    |                      | -0.268***<br>(0.062) |
| <b><u>Instruments-State Food Stamp Rules<sup>b</sup></u></b> |                      |                      |
| <i>Biometric technology</i>                                  | -0.261**<br>(0.108)  |                      |
| <i>Outreach spending per capita</i>                          | 0.384*<br>(0.223)    |                      |
| <i>All legal immigrants eligible X noncitizen immigrant</i>  | 0.418**<br>(0.179)   |                      |
| <i>Some legal immigrants eligible X noncitizen immigrant</i> | 0.365**<br>(0.174)   |                      |
| <b><u>Demographic Characteristics</u></b>                    |                      |                      |
| <i>Age</i>                                                   | -0.015***<br>(0.004) | 0.031***<br>(0.005)  |
| <i>Age squared</i>                                           | 0.000**<br>(0.000)   | -0.000***<br>(0.000) |
| <i>Noncitizen immigrant</i>                                  | -0.462***<br>(0.168) | -0.009<br>(0.055)    |
| Race/Ethnicity (Omitted: White, non-Hispanic)                |                      |                      |
| <i>Black, non-Hispanic</i>                                   | 0.380***<br>(0.028)  | 0.132***<br>(0.043)  |
| <i>Hispanic</i>                                              | 0.209*<br>(0.045)    | 0.045<br>(0.045)     |

|                                                           |           |          |
|-----------------------------------------------------------|-----------|----------|
|                                                           | (0.121)   | (0.053)  |
| <i>Other, non-Hispanic</i>                                | 0.292***  | 0.198*   |
|                                                           | (0.080)   | (0.118)  |
| Educational Attainment (Omitted: More than high school)   |           |          |
| <i>Less than high school</i>                              | 0.461***  | 0.109**  |
|                                                           | (0.038)   | (0.045)  |
| <i>High school only</i>                                   | 0.221***  | 0.015    |
|                                                           | (0.031)   | (0.035)  |
| <i>Number of children in household</i>                    | 0.266***  | 0.038**  |
|                                                           | (0.015)   | (0.017)  |
| <i>Number of adults in household</i>                      | -0.045*** | -0.044*  |
|                                                           | (0.015)   | (0.027)  |
| Household Structure (Omitted: Two adult-headed household) |           |          |
| <i>Female-headed household</i>                            | 0.665***  | 0.367*** |
|                                                           | (0.030)   | (0.047)  |
| <i>Male-headed household</i>                              | 0.237***  | 0.276*** |
|                                                           | (0.043)   | (0.051)  |
| <i>Disabled person in household</i>                       | 0.791***  | 0.528*** |
|                                                           | (0.036)   | (0.038)  |
| <i>Metropolitan area</i>                                  | -0.092**  | 0.032    |
|                                                           | (0.037)   | (0.043)  |
| <b><u>Economic Characteristics</u></b>                    |           |          |
| <i>State monthly unemployment</i>                         | -0.074    | 0.112    |
|                                                           | (0.216)   | (0.253)  |
| <i>State monthly employment-population ratio</i>          | -5.883    | 1.395    |
|                                                           | (21.78)   | (25.40)  |
| <i>State annual per capita income (in \$100s)</i>         | -0.001    | 0.001    |

|                                     |           |          |
|-------------------------------------|-----------|----------|
|                                     | (0.002)   | (0.003)  |
| <i>Quarterly GDP (in trillions)</i> | -0.073    | -0.015   |
|                                     | (0.093)   | (0.171)  |
| <b><u>Year</u></b>                  |           |          |
| 1998                                | -0.470*** | -0.028   |
|                                     | (0.178)   | (0.308)  |
| 2003                                | -0.255*** | -0.206   |
|                                     | (0.078)   | (0.143)  |
| Constant                            | 6.197     | -3.859   |
|                                     | (20.02)   | (26.17)  |
| Rho                                 |           | 0.284*** |
|                                     |           | (0.035)  |
| Number of Observations              |           | 65,269   |

<sup>a</sup> Sample includes households with income below 150% of poverty threshold who have liquid assets below \$4,000, or below \$5,000 if one member of the household is age 60 or older.

<sup>b</sup> A joint test for significance of the four instruments indicates that they are jointly statistically significant at the one percent level ( $\chi^2(4)=14.9$ ,  $p=0.005$ ).

Note: The unit of observation is a household-month. Robust standard errors are presented within parentheses. Standard errors are adjusted for clustering by state. \*\*\*  $p<0.01$ , \*\*  $p<0.05$ , \*  $p<0.1$

**Appendix Table A-3: Estimates of the Effects of SNAP Participation on the Likelihood of Being Food Insecure and Very Food Insecure, Households with Income below 130% of Poverty Threshold<sup>a</sup>**

| Explanatory Variable   | Food Insecure   |               |                       |               | Very Food Insecure |               |                       |               |
|------------------------|-----------------|---------------|-----------------------|---------------|--------------------|---------------|-----------------------|---------------|
|                        | Probit          |               | Bivariate Probit (IV) |               | Probit             |               | Bivariate Probit (IV) |               |
|                        | (1)             |               | (2)                   |               | (3)                |               | (4)                   |               |
|                        | <i>Marginal</i> |               | <i>Marginal</i>       |               | <i>Marginal</i>    |               | <i>Marginal</i>       |               |
|                        | <i>Coeff/SE</i> | <i>Effect</i> | <i>Coeff/SE</i>       | <i>Effect</i> | <i>Coeff/SE</i>    | <i>Effect</i> | <i>Coeff/SE</i>       | <i>Effect</i> |
| <i>SNAP Receipt</i>    | 0.251 ***       | 0.081         | -0.424 ***            | -0.13         | 0.157 ***          | 0.027         | -0.211 ***            | -0.03         |
|                        | (0.026)         |               | (0.109)               |               | (0.033)            |               | (0.073)               |               |
| Rho                    |                 |               | 0.403 ***             |               |                    |               | 0.221 ***             |               |
|                        |                 |               | (0.065)               |               |                    |               | (0.040)               |               |
| Number of Observations | 52,029          |               | 52,029                |               | 52,029             |               | 52,029                |               |

<sup>a</sup> Sample includes households with income below 130% of the poverty threshold who have liquid assets below \$2,000, or below \$3,000 if one member of the household is age 60 or older.

Note: The unit of observation is a household-month. Robust standard errors are presented within parentheses. Standard errors are adjusted for clustering by state. All models include controls for age, age squared, noncitizen immigrant, black, Hispanic, other non-white race, no high school degree, high school degree only, number of children in household, number of adults in household, female-headed household, male-headed household, disabled person in household, and metropolitan area; state unemployment rate, state employment-population ratio, state per capita income, and gross domestic product; state and year dummy variables. Instrumental variables are biometric technology, outreach spending per capita, and immigrant eligibility rules (i.e., all legal immigrants eligible interacted with noncitizen and some legal immigrants eligible interacted with noncitizen). \*\*\*  $p < 0.01$ , \*\*  $p < 0.05$ , \*  $p < 0.1$
